# Supplementary material for: The impacts of elevated CO 2 on forest growth, mortality, and recovery in the Amazon rainforest
Source: Copernicus journal article supplement (doi:10.5194/esd-15-763-2024), 2024-06-13
Supplement: Supplementary file 1 [file esd-15-763-2024-supplement.pdf]

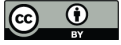

*Supplement of*

## **The impacts of elevated CO<sub>2</sub> on forest growth, mortality, and recovery in the Amazon rainforest**

**Yitong Yao et al.**

*Correspondence to:* Yitong Yao (yyao2@caltech.edu)

The copyright of individual parts of the supplement might differ from the article licence.

**Table S1** Summary of eCO<sub>2</sub> fertilization effects.

| Time period | Term                    | Magnitude                                            | Method                                                                                                         | Reference                   |
|-------------|-------------------------|------------------------------------------------------|----------------------------------------------------------------------------------------------------------------|-----------------------------|
| 1980-2019   | AGB gain<br>(DBH>10 cm) | Amazon rainforest:<br>5% per decade                  | ORCHIDEE model with<br>climate impacts on growth and<br>mortality, CO <sub>2</sub> , stand level<br>demography | This study                  |
| 2001-2016   | GPP                     | Global 4.1% per<br>decade<br>EBF: 4.8% per<br>decade | Analytical approach                                                                                            | Chen et al (2022)           |
| 2001-2016   | GPP                     | EBF: 1.61-5.78% per<br>decade                        | TRENDY models (S1)                                                                                             | Chen et al (2022)           |
| 1981-2020   | GPP                     | Global: 3.4% per<br>decade                           | Remote sensing + ecological<br>optimality theory                                                               | Keenan et al (2023)         |
| 1982-2011   | NPP                     | Tropical: 2.7% per<br>decade                         | CMIP5                                                                                                          | Kolby Smith et al<br>(2016) |
| 1980-2016   | GPP                     | Tropical: 3.7% per<br>decade                         | CABLE model                                                                                                    | Haverd et al (2020)         |

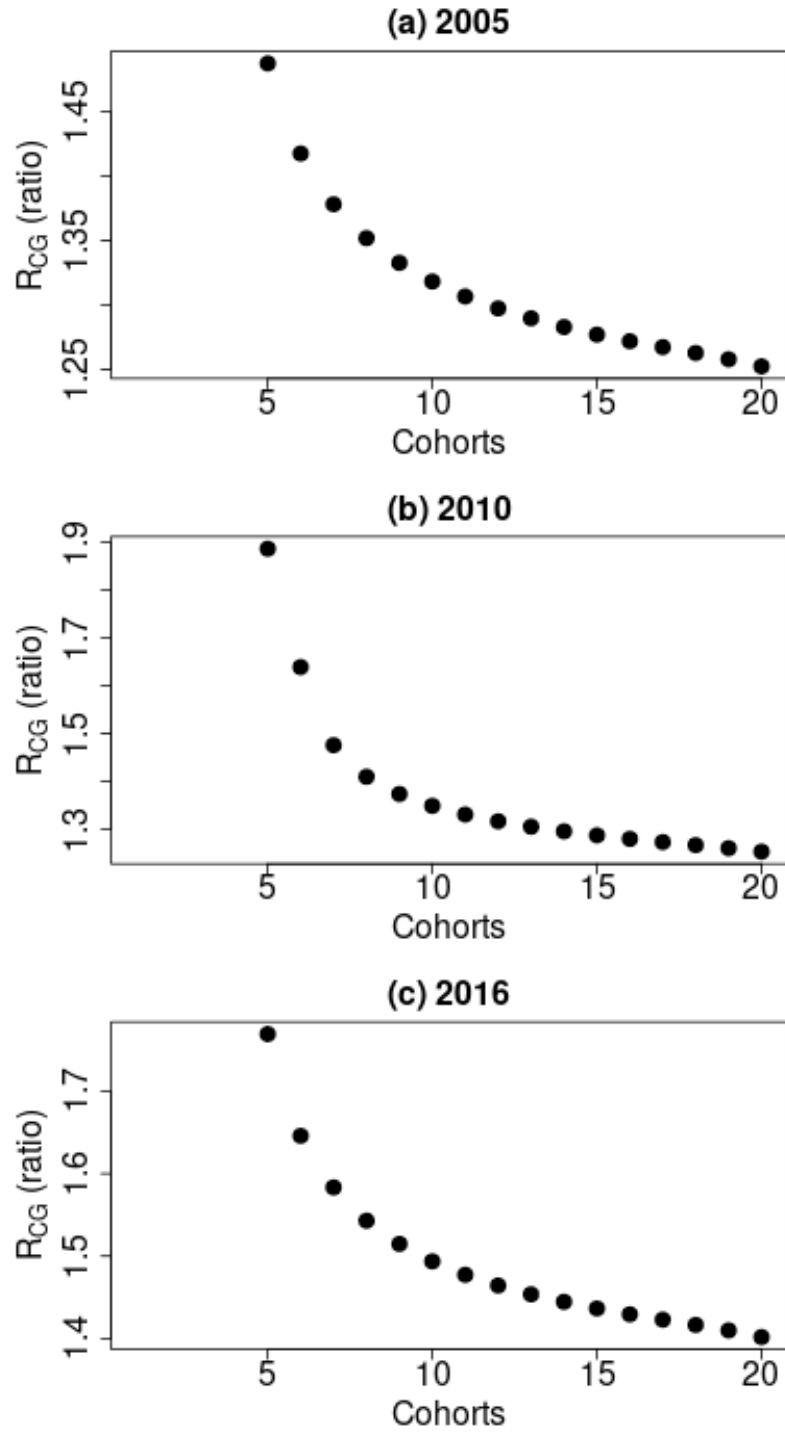

**Fig. S1** The effect of eCO<sub>2</sub> on biomass carbon gains over different cohorts during three drought events, (a) 2005, (b) 2010, and (c) 2016. The average of  $R_{CG}$  over drought epicenter is shown for each cohort.

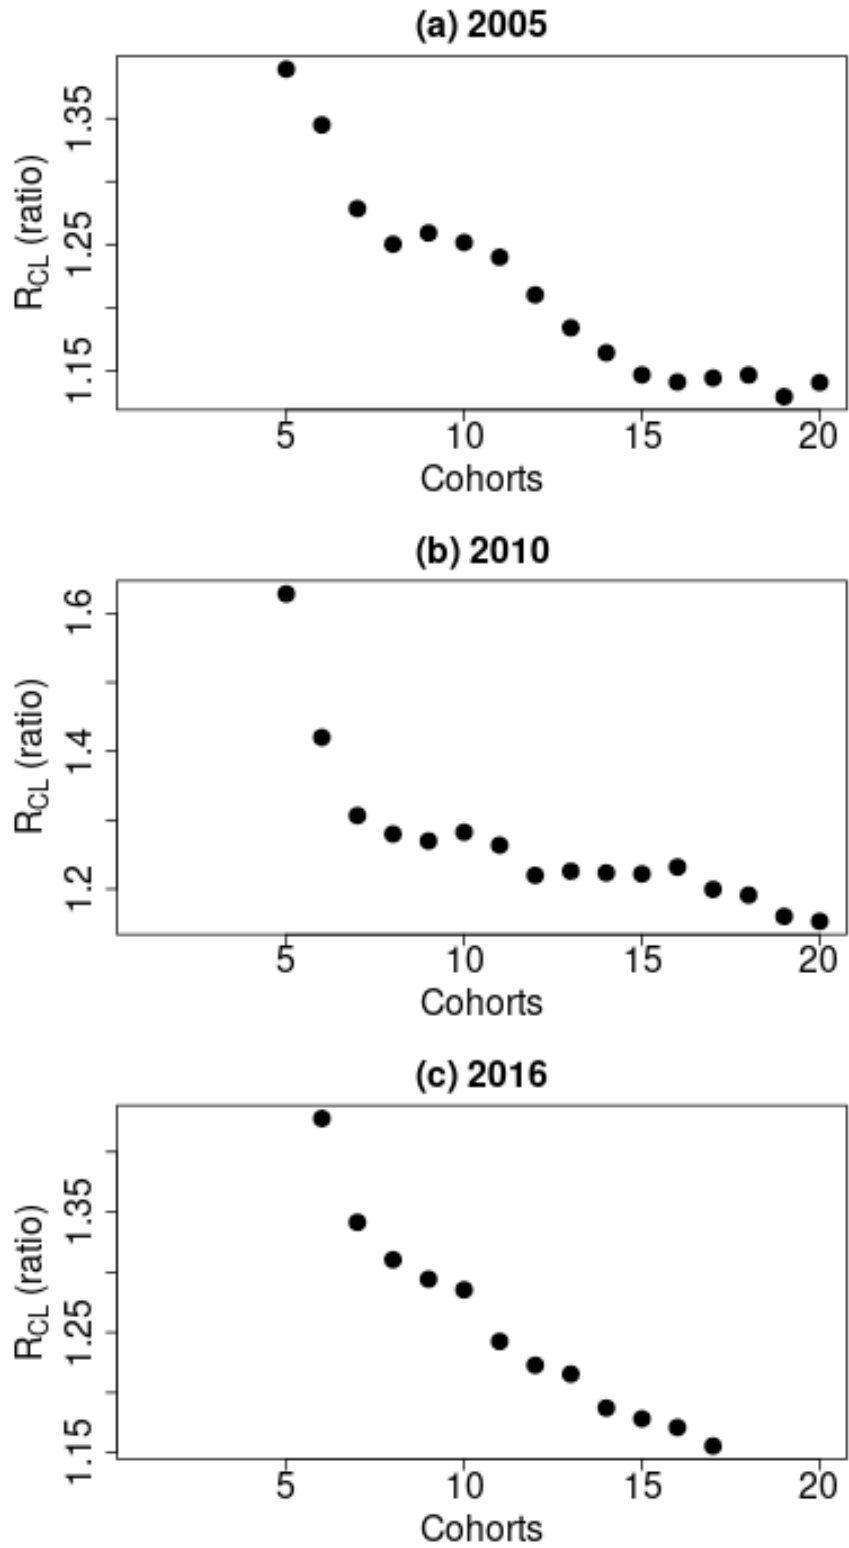

**Fig. S2** The effect of eCO<sub>2</sub> on biomass carbon losses over different cohorts during three drought events, (a) 2005, (b) 2010, and (c) 2016. The average of  $R_{CL}$  over drought epicenter is shown for each cohort.

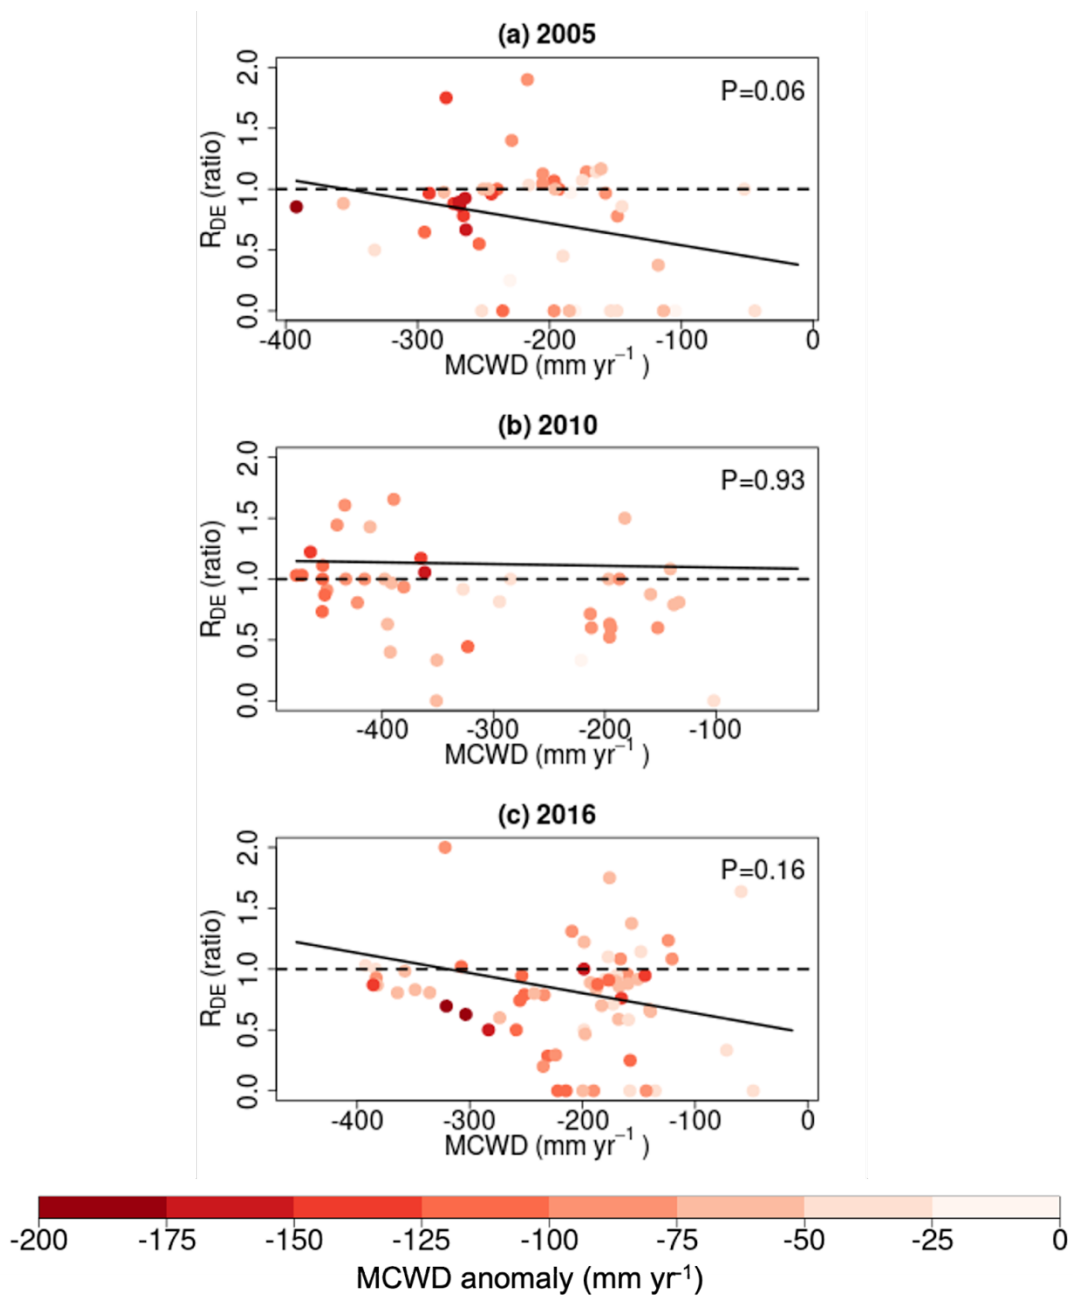

**Fig. S3** The effect of  $e\text{CO}_2$  on drought exposure days. Dots are color-coded to reflect the drought intensity characterized by MCWD anomaly, with darker colors indicating more severe water deficits. The dots shown in the panel correspond to pixels located in the epicenter of the drought, featuring  $Z_{\text{MCWD}}$  values below -1. This threshold is set to ensure an adequate number of pixels for our analysis.

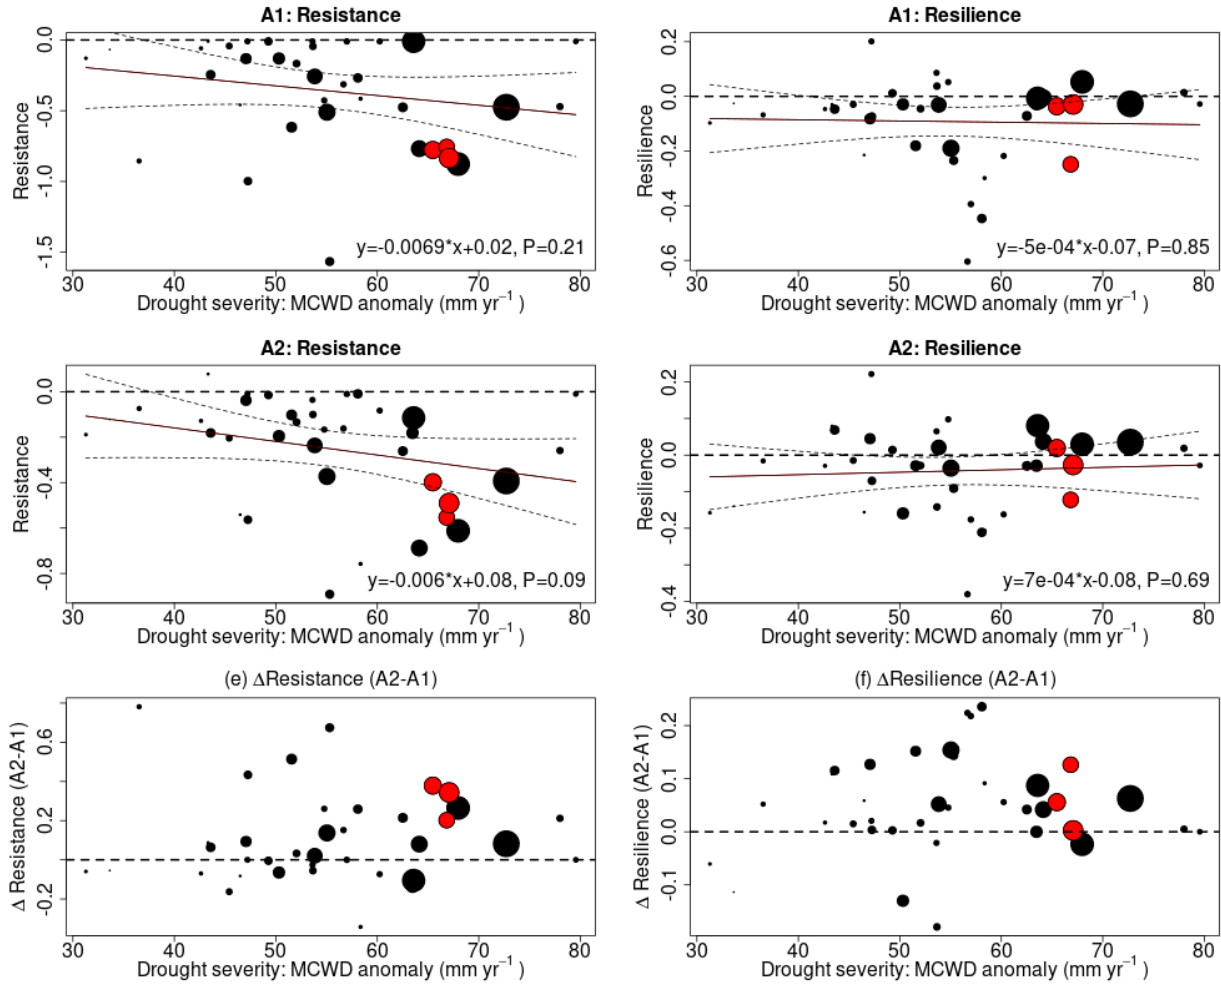

**Fig. S4** Similar to Figure 6 but using MCWD anomaly as drought severity metric on the horizontal axis.

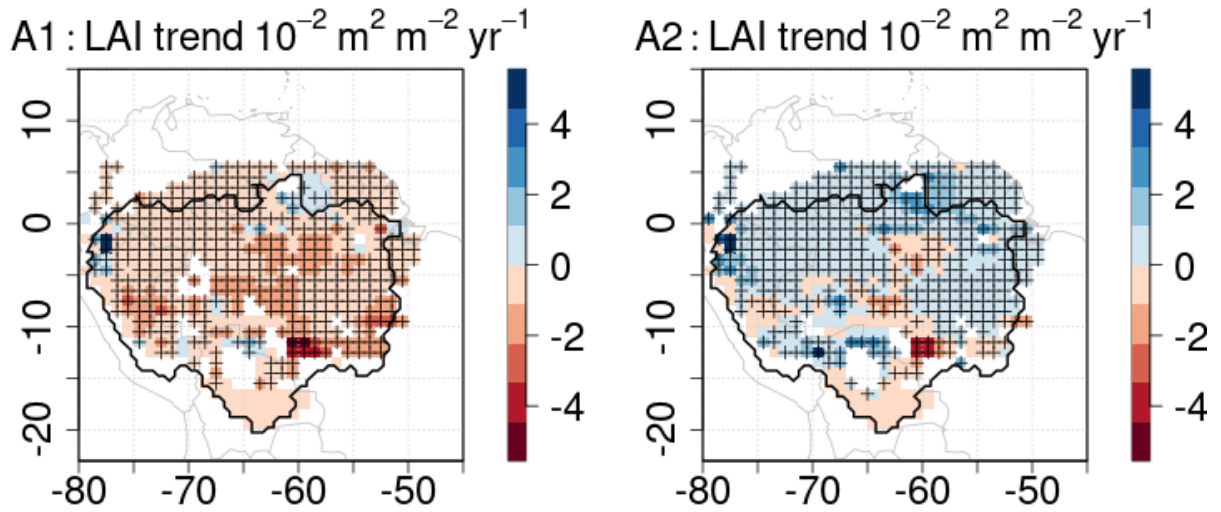

Fig. S5 Spatial distribution of LAI trend over the Amazon rainforest. Markers in the panel denote significant LAI trends over the past four decades ( $P < 0.05$ ).

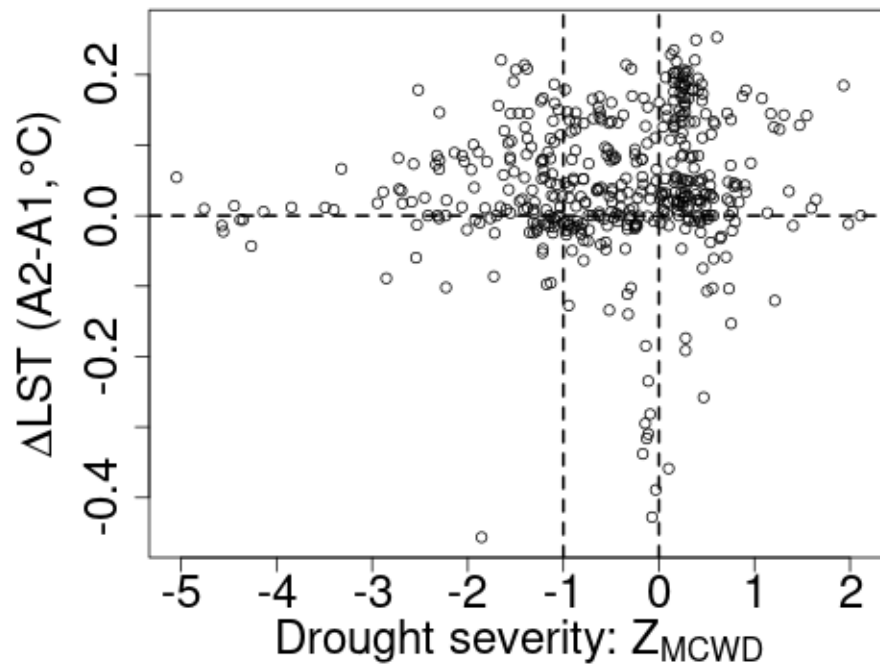

Fig. S6 The land surface temperature change ( $\Delta \text{LST}$ ) in relation to Z scores of MCWD due to  $e\text{CO}_2$  during 2015-16 El Nino.

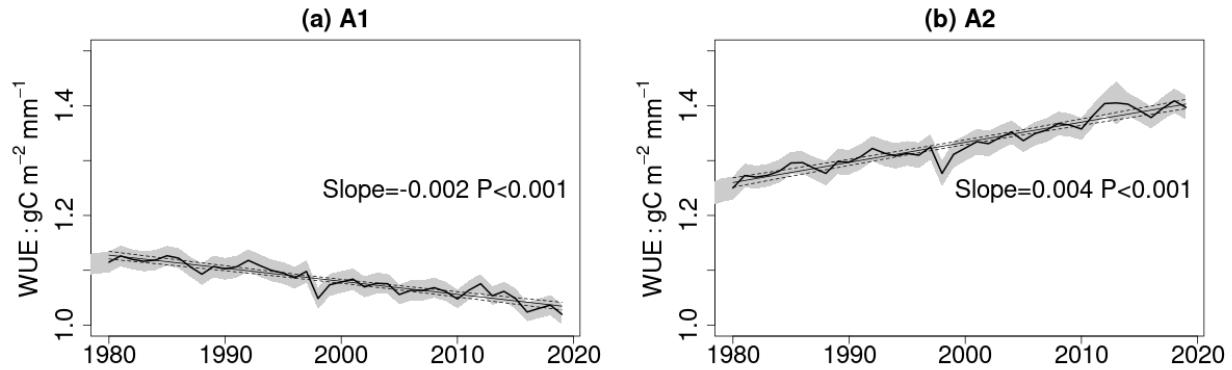

**Fig. S7** Trends in water use efficiency (WUE) in (a) A1 and (b) A2. Here WUE is calculated as the ratio between annual GPP and annual ET.

#### References

- Chen, C., Riley, W. J., Prentice, I. C., & Keenan, T. F. CO<sub>2</sub> fertilization of terrestrial photosynthesis inferred from site to global scales. *Proc. Natl. Acad. Sci.*, 119(10), e2115627119, 2022.
- Fleischer, K., Rammig, A., De Kauwe, M. G., Walker, A. P., Domingues, T. F., Fuchslueger, L., ... & Lapola, D. M. Amazon forest response to CO<sub>2</sub> fertilization dependent on plant phosphorus acquisition. *Nat. Geosci.*, 12(9), 736-741, 2019.
- Haverd, V., Smith, B., Canadell, J. G., Cuntz, M., Mikaloff-Fletcher, S., Farquhar, G., ... & Trudinger, C. M. Higher than expected CO<sub>2</sub> fertilization inferred from leaf to global observations. *Glob. Change Biol.*, 26(4), 2390-2402, 2020.
- Keenan, T. F., Luo, X., Stocker, B. D., De Kauwe, M. G., Medlyn, B. E., Prentice, I. C., ... & Zhou, S. A constraint on historic growth in global photosynthesis due to rising CO<sub>2</sub>. *Nat. Clim. Change*, 13(12), 1376-1381, 2023.
- Kolby Smith, W., Reed, S. C., Cleveland, C. C., Ballantyne, A. P., Anderegg, W. R., Wieder, W. R., ... & Running, S. W. Large divergence of satellite and Earth system model estimates of global terrestrial CO<sub>2</sub> fertilization. *Nat. Clim. Change*, 6(3), 306-310, 2016.
- Sitch, S., Smith, B., Prentice, I. C., Arneth, A., Bondeau, A., Cramer, W., ... & Venevsky, S. Evaluation of ecosystem dynamics, plant geography and terrestrial carbon cycling in the LPJ dynamic global vegetation model. *Glob. Change Biol.*, 9(2), 161-185, 2003.
